# Supplementary material for: Green Stability Indicating Organic Solvent-Free HPLC Determination of Remdesivir in Substances and Pharmaceutical Dosage Forms
Source: MDPI journal article supplement (doi:10.3390/separations8120243), 2021-12-12
Supplement: s1 [file s1]

Archive with 1 entries (1 files):
- separations-1502798-supplementary.pdf
