# Supplementary material for: Green Stability Indicating Organic Solvent-Free HPLC Determination of Remdesivir in Substances and Pharmaceutical Dosage Forms
Source: MDPI journal article supplement (doi:10.3390/separations8120243), 2021-12-12
Supplement: s1 [file s1 › separations-1502798-supplementary.pdf]

Supplementary Materials

# Green Stability Indicating Organic Solvent-Free HPLC Determination of Remdesivir: A COVID-19 Candidate Antiviral, in Pure Form and Pharmaceutical Dosage Forms

Adel Ehab Ibrahim <sup>1</sup>, Sami El Deeb <sup>2,3\*</sup>, Emad Mahmoud Abdelhalim <sup>4</sup>, Ahmed Al-Harrasi <sup>3</sup> and Rania Adel Sayed <sup>5</sup>

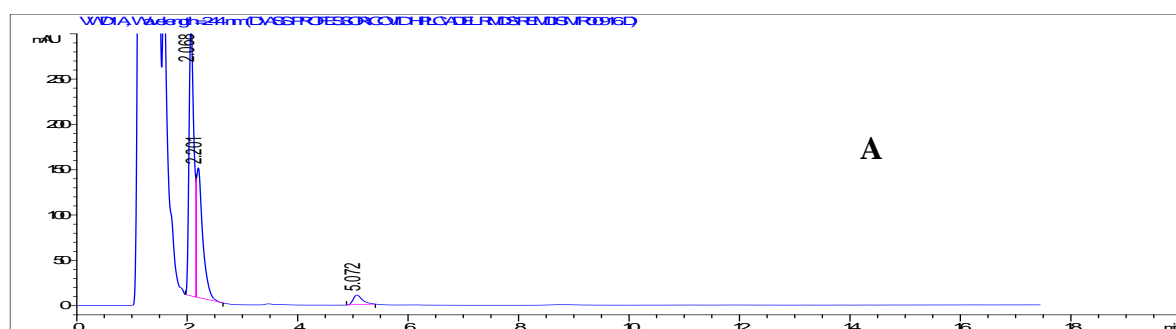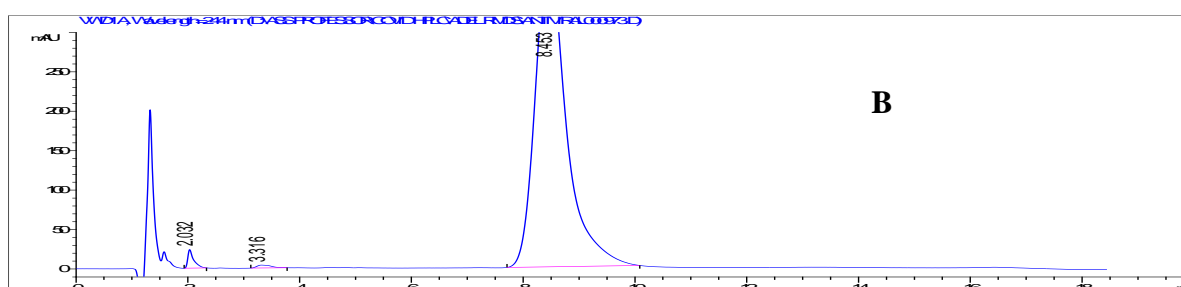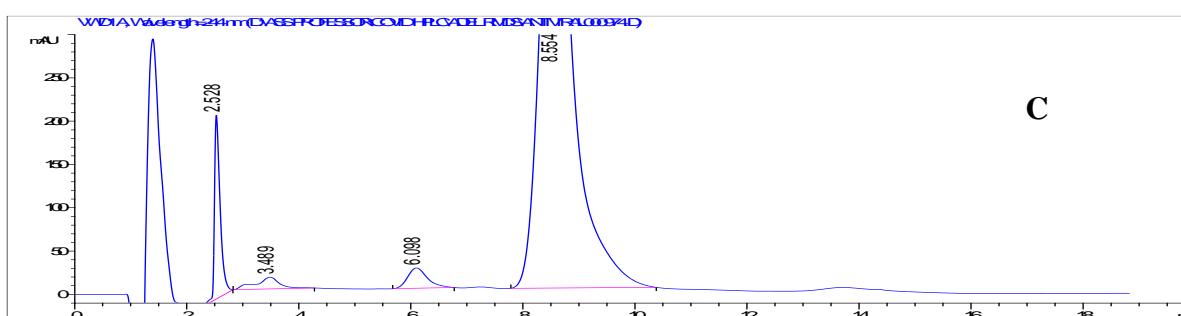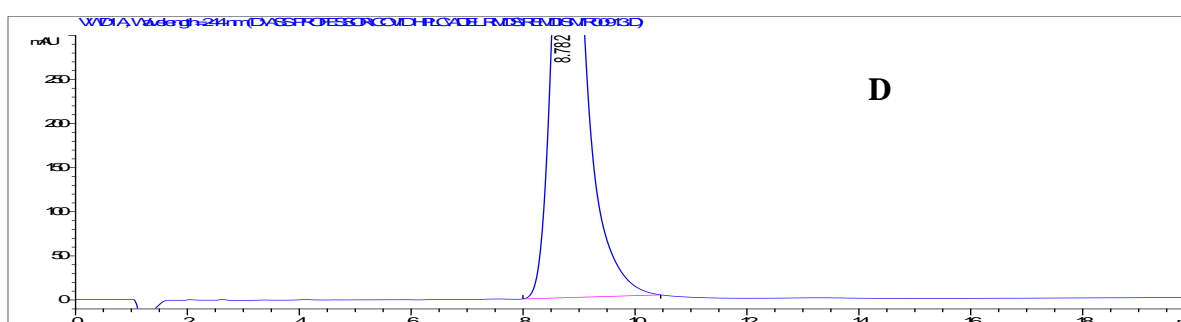

**Figure S1.** Chromatograms showing degradation of RDS in (A) 0.1N NaOH, 25°C/ 3 hours (B) 0.1N HCl, 40°C/ 1 hour, (C) 4.5% hydrogen peroxide, 50°C/1 hour, (D) Photolytic degradation; under the proposed chromatographic conditions.
